# Supplementary material for: Using MaxEnt Model to Predict the Potential Distribution of Three Potentially Invasive Scarab Beetles in China
Source: MDPI journal article supplement (doi:10.3390/insects14030239), 2023-02-27
Supplement: s1 [file s1]

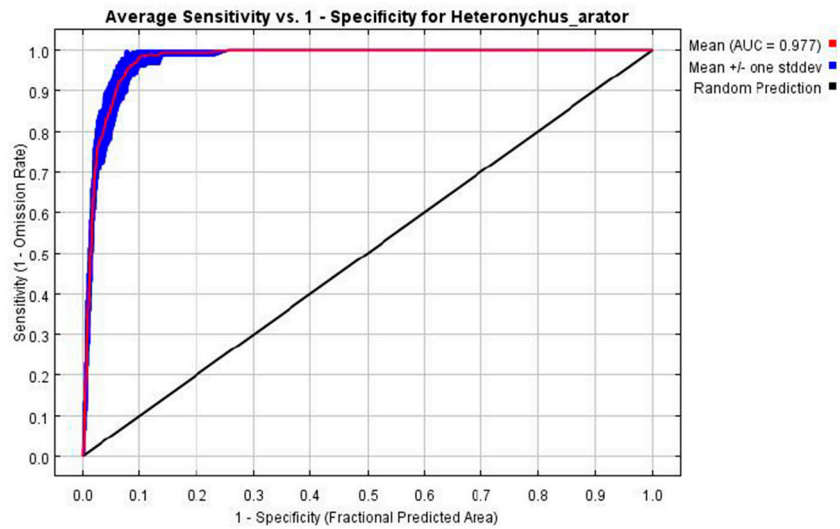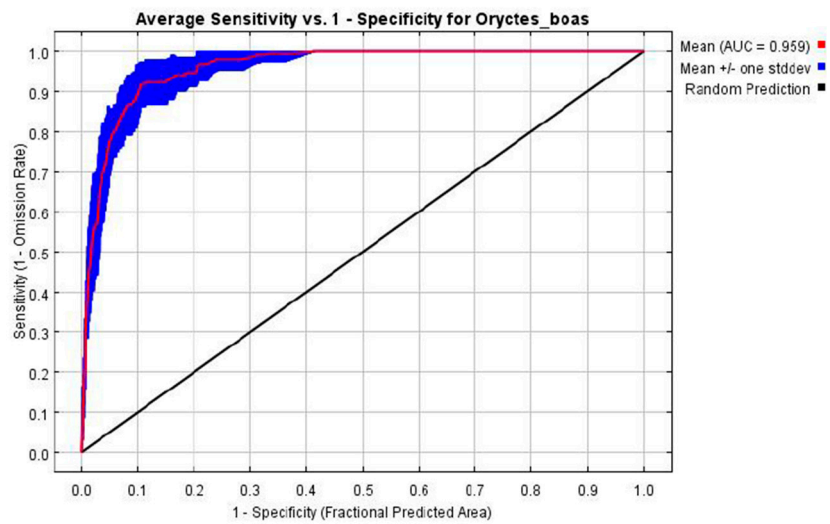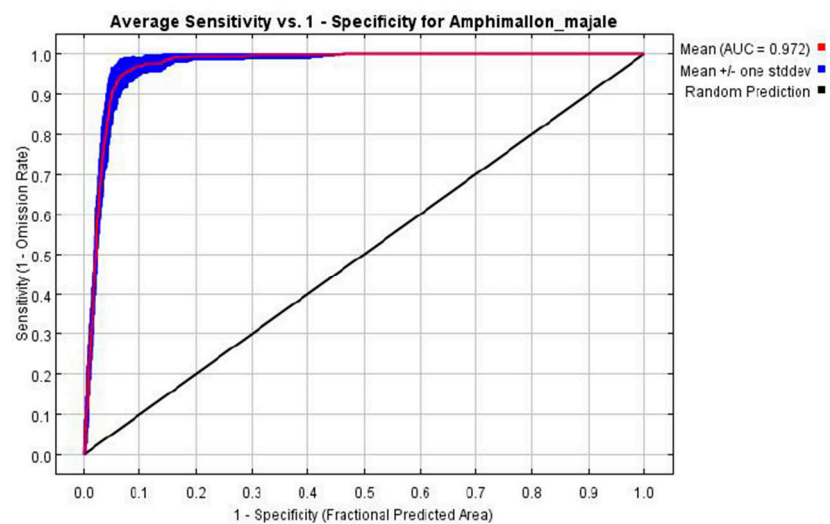

Supplement figure S1. ROC curve of *Heteronychus arator*, *Oryctes boas* and *Amphimallon majale*

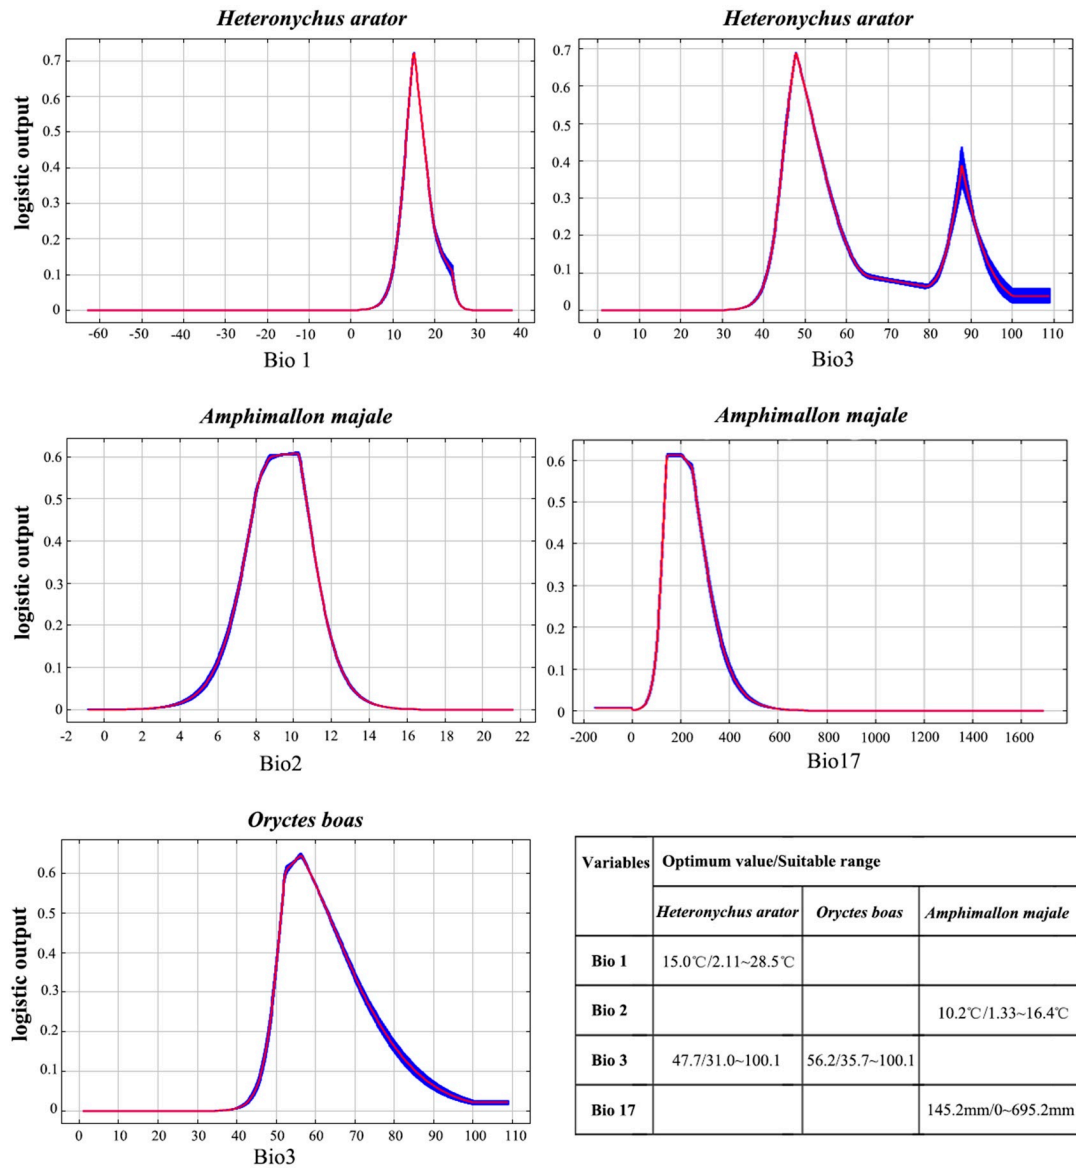

Supplement figure S2. Response curve of key environment variables
